# Supplementary material
Source: MDPI journal article supplement (https://www.mdpi.com/1999-4907/10/5/416)
Supplement: s1 [file s1]

**Table S1.** Years of extremely high ( $> 23.84^{\circ}\text{C}$ ) and low ( $< 21.78^{\circ}\text{C}$ ) reconstructed mean maximum temperatures from June to July ( $T_{\text{max6-7}}$ ) from most extreme to least.

| Rank | Warm year | $T_{\text{max6-7}}$ | Cold year | $T_{\text{max6-7}}$ |
|------|-----------|---------------------|-----------|---------------------|
| 1    | 1890      | 24.96               | 1985      | 19.81               |
| 2    | 1797      | 24.81               | 1986      | 19.96               |
| 3    | 1796      | 24.73               | 1993      | 20.14               |
| 4    | 1849      | 24.66               | 1962      | 20.24               |
| 5    | 1891      | 24.41               | 1990      | 20.30               |
| 6    | 1848      | 24.40               | 1961      | 20.44               |
| 7    | 1918      | 24.36               | 1987      | 20.51               |
| 8    | 1795      | 24.34               | 1988      | 20.51               |
| 9    | 1784      | 24.22               | 1983      | 20.53               |
| 10   | 1892      | 24.22               | 2004      | 20.55               |
| 11   | 1921      | 24.16               | 1984      | 20.60               |
| 12   | 1865      | 24.14               | 1964      | 20.71               |
| 13   | 1852      | 24.12               | 1969      | 20.82               |
| 14   | 1829      | 24.08               | 1989      | 20.83               |
| 15   | 1861      | 24.07               | 1991      | 20.88               |
| 16   | 1860      | 24.06               | 2003      | 20.94               |
| 17   | 1811      | 24.02               | 1976      | 21.01               |
| 18   | 1866      | 24.00               | 1995      | 21.07               |
| 19   | 1812      | 23.98               | 1965      | 21.12               |
| 20   | 1919      | 23.98               | 1929      | 21.17               |
| 21   | 1851      | 23.97               | 2002      | 21.20               |
| 22   | 1889      | 23.95               | 1956      | 21.29               |
| 23   | 1941      | 23.93               | 1992      | 21.29               |
| 24   | 1862      | 23.91               | 2001      | 21.29               |
| 25   | 1776      | 23.91               | 1963      | 21.31               |
| 26   | 1864      | 23.90               | 1975      | 21.32               |
| 27   | 1922      | 23.89               | 1787      | 21.41               |
| 28   | 1885      | 23.89               | 1967      | 21.47               |
| 29   | 1775      | 23.88               | 1971      | 21.51               |
| 30   | 1854      | 23.87               | 1982      | 21.55               |
| 31   | 1884      | 23.87               | 1974      | 21.56               |
| 32   | 1888      | 23.87               | 1966      | 21.56               |
| 33   | 1822      | 23.87               | 1977      | 21.68               |
| 34   | 1873      | 23.87               | 1978      | 21.72               |
| 35   | 1823      | 23.86               |           |                     |
| 36   | 1868      | 23.85               |           |                     |

**Table S2.** Flood and drought events recorded in historical archives in Jilin Province since 1772 [52].

| Disaster<br>year | Short description of weather or related events                                                                                            |
|------------------|-------------------------------------------------------------------------------------------------------------------------------------------|
| 1811             | <b>Jilin province:</b> Drought occurred in Dashengwula (now Jilin city)                                                                   |
| 1812             | <b>Jilin province:</b> Droughts occurred in Dashengwula (now Jilin city)                                                                  |
| 1860             | <b>Jilin province:</b> There was little rainfall all year round                                                                           |
| 1865             | <b>Jilin province:</b> Droughts occurred in the provincial capital                                                                        |
| 1885             | <b>Jilin province:</b> Droughts occurred in Changchun                                                                                     |
| 1919             | <b>Jilin province:</b> Droughts occurred in the Dongfeng, Tonghua, Panshi, Shuangliao and Meihekou.                                       |
| 1921             | <b>Jilin province:</b> Droughts occurred in the Tongyu, Yitong and Lishu.                                                                 |
| 1929             | <b>Jilin province:</b> Flooding disaster occurred in Huadian, Yongji, Liaoyuan, Dehui, Yushu, Tongyu, Meihekou, Anguang, Panshi and Fuyu. |
| 1961             | <b>Jilin province:</b> Flooding disaster occurred in the Changbai Mountain                                                                |
| 1962             | <b>Jilin province:</b> Flooding disaster occurred in the Changbai Mountain                                                                |
| 1964             | <b>Jilin province:</b> Flooding disaster occurred in the Changbai Mountain                                                                |
| 1965             | <b>Jilin province:</b> Flooding disaster occurred in the Changbai Mountain                                                                |
| 1969             | <b>Jilin province:</b> Flooding disaster occurred in the Changbai Mountain                                                                |
| 1976             | <b>Jilin province:</b> Flooding disaster occurred in the Changbai Mountain                                                                |
| 1983             | <b>Jilin province:</b> Flooding disaster occurred in the Changbai Mountain                                                                |
| 1984             | <b>Jilin province:</b> Flooding disaster occurred in the Changbai Mountain in summer                                                      |
| 1985             | <b>Jilin province:</b> Severe flooding disaster occurred in Changchun during June and July                                                |
| 1987             | <b>Jilin province:</b> Flooding disaster occurred in Jiuzhan, Hunchun, Longjing, Antu, Daan, Qianguo, Tongyu and Tonghua in July          |
| 1988             | <b>Jilin province:</b> Flooding disaster occurred in Yushu and Daan in July                                                               |
| 1989             | <b>Jilin province:</b> Flooding disaster occurred in 11 regions in July, such as Baishan, Huadian, Jian, etc.                             |
| 1990             | <b>Jilin province:</b> Flooding disaster occurred in Jian, Baicheng, Fuyu and Daan in June and July                                       |
| 1991             | <b>Jilin province:</b> Severe flooding disaster occurred in 15 regions in June and July, such as Helong, Hunchun, Liuhe, etc.             |
